1 **A Two-Component System FleS/FleR Regulates Multiple**  
2 **Virulence-Related Traits in *Pseudomonas aeruginosa***

3 Tian Zhou<sup>1,2</sup>, Jia-hui Huang<sup>1,2</sup>, Qi-shun Feng<sup>2</sup>, Zhi-qing Liu<sup>1,2</sup>, Qi-qi Lin<sup>1,2</sup>, Zeling Xu<sup>1,2\*</sup>  
4 and Lian-Hui Zhang<sup>1,2\*</sup>

5 <sup>1</sup>Guangdong Laboratory for Lingnan Modern Agriculture, South China Agricultural  
6 University, Guangzhou 510642, China

7 <sup>2</sup>Guangdong Province Key Laboratory of Microbial Signals and Disease Control,  
8 Integrative Microbiology Research Center, South China Agricultural University,  
9 Guangzhou 510642, China

10

11 **Running Title:** FleS/FleR regulates virulence of *P. aeruginosa*

12

13 **\* Correspondence:**

14 Zeling Xu (zelingxu@scau.edu.cn)

15 Lian-Hui Zhang (lh Zhang01@scau.edu.cn)

16

## 17 **Abstract**

18 Microorganisms commonly use two-component systems (TCSs) to detect specific  
19 environmental changes and respond accordingly for their own benefit. However, the  
20 regulatory mechanisms and physiological roles of a majority of TCSs are still elusive. In  
21 this study, we focused on a previously predicted TCS FleS/FleR in *Pseudomonas*  
22 *aeruginosa* to systematically investigate its regulation and physiological roles. Loss of  
23 *fleS* or *fleR* or both genes led to decreased biofilm formation and attenuated motility in  
24 PAO1, which could be restored by heterologously complementation of FleR but not FleS,  
25 confirming that the sensor kinase FleS and the response regulator FleR constitute a TCS  
26 pair. To determine the regulatory spectrum of this TCS, we conducted transcriptome  
27 sequencing and comparison between the wild-type strain and the *fleR* deletion mutant.  
28 The result showed that the TCS regulates about 440 genes including most of them are  
29 involved in the virulence-related pathways, e.g. siderophore biosynthesis, pyocyanin  
30 biosynthesis, type III/VI secretion systems, c-di-GMP metabolism, flagellar assembly *etc.*  
31 In addition to its roles in controlling biofilm formation and motility we have already  
32 shown, FleR was demonstrated to regulate the production of virulence factors such as  
33 pyocyanin and elastase, mediate stress response to SDS, and autoregulate its own  
34 expression. Moreover, EMSA assays revealed that FleR regulates flagellum biosynthesis  
35 genes *flgBCDE*, *flgFGHIJKL*, *filC*, which are essential for the bacterial motility, by  
36 directly interacting with their promoters. Taken together, these results expanded our  
37 understanding on the biological roles of FleS/FleR and provided new insights on its  
38 regulatory mechanisms.

39

40 **Keywords:** *Pseudomonas aeruginosa*, two-component system, FleS/FleR, biofilm,  
41 motility, flagellum biosynthesis, virulence factors

42

## 43 INTRODUCTION

44 *Pseudomonas aeruginosa* is a ubiquitous Gram-negative bacterial pathogen which  
45 accounts for ~10% of hospital-acquired infections (Lyczak., 2003). This opportunistic  
46 pathogen frequently causes chronic lung infection, pulmonary inflammation, soft-tissue  
47 and other types of infections in immune compromised individuals (Deretic et al., 1995). *P.*  
48 *aeruginosa* can survive in diverse environments and outbreaks of drug-resistant strains  
49 are common among hospital wards and intensive care units (Costerton et al., 1995;  
50 Quinn., 2003). Human infections caused by *P. aeruginosa* is greatly attributed to its  
51 capabilities of producing various virulence factors, such as pyocyanin, elastase,  
52 rhamnolipids, exotoxins, lipopolysaccharides *etc.* (Dong et al., 2008; Wang et al.,2013).  
53 Moreover, swimming in liquid environments and swarming on semisolid surfaces are two  
54 major types of motility in *P. aeruginosa*, which enable the pathogen to expand the  
55 colonization niches and lead to systemic infections (Drake et al., 1988; Wang et al., 2014;  
56 Lai et al., 2009; Yeung et al., 2012). If not eradicated by the human immune systems,  
57 continuous infection of *P. aeruginosa* can result in its adaptation to human environment  
58 with biofilm formation, which increases its persistence and finally establishes long-term  
59 chronic infections (Costerton et al., 1995; Sousa et al, 2014).

60 The diverse virulence traits of *P. aeruginosa* are regulated by various regulatory systems  
61 such as two-component systems (TCSs), quorum sensing (QS) systems and

62 host-pathogen cell-cell communication systems (Lee et al., 2015; Ahator et al., 2019).  
63 Bacterial TCS is one of the most common signal transduction systems with which  
64 bacteria perceive, respond and adapt to changes in the surrounding environment (Dong et  
65 al., 2008). A TCS typically consists of an inner transmembrane histidine sensor kinase  
66 and a response regulator with a signal receiver domain and a DNA binding domain. The  
67 sensor kinase detects environmental stimuli and autophosphorylates the conserved  
68 histidine residue of the kinase domain, which subsequently phosphorylates an invariant  
69 aspartate residue at the receiver domain of the cytoplasmic response regulator. The  
70 activated response regulator then regulates the expression of downstream genes via  
71 protein-DNA interaction (He et al., 2006 and 2009). Bioinformatics analysis identified  
72 approximately 64 sensor kinases and 73 response regulators in *P. aeruginosa* (Rodrigue et  
73 al., 2000; Galperin et al., 2006), indicating the pathogen had evolved sophisticated  
74 mechanisms to adapt to the changing environments. Among them, a few TCSs are known  
75 for regulation of various virulence traits in *P. aeruginosa*. For example, GacS/GacA is  
76 involved in regulating quorum sensing via small RNAs (Kay et al., 2006; Brencic et al.,  
77 2009), BqsS/BqsR influences rhamnolipids production and biofilm formation (Dong et al.,  
78 2008 ), and FimS/AlgR regulates alginate biosynthesis, motility and cytotoxicity (Deretic  
79 et al., 1989; Whitchurch et al.,1996). Despite these progresses, the biological roles and  
80 regulatory mechanisms of many other TCSs in *P. aeruginosa* have not yet been fully  
81 elucidated.

82 The genes *PA1098* and *PA1099* are predicted to encode a TCS, designated as FleS/FleR.  
83 Both FleS and FleR are found essential for swarming motility in the *P. aeruginosa* strain  
84 PA14 (Kollaran et al., 2019). Supporting its role in bacterial motility, mutation of *fleR*

85 was shown to abrogate the biogenesis of flagellum in the *P. aeruginosa* PAK strain  
86 (Ritchings et al., 1995). In addition, previous studies showed that expression of FleS/FleR  
87 is regulated by FleQ and another TCS PilS/PilR (Jyot et al., 2002; Kilmury et al., 2018).  
88 Interestingly, the *fleS* and *fleR* deletion mutants displayed attenuated cytotoxicity against  
89 cultured human bronchial epithelial cells (Gellatly et al., 2018), suggesting that this TCS  
90 potentially contributes to the regulation of other virulence-related traits in *P. aeruginosa*  
91 in addition to motility. In this study, we first showed the role of the histidine kinase FleS  
92 and the response regulator FleR in biofilm formation and motility and then verified they  
93 constitute a TCS pair. Transcriptome and phenotypic analyses showed FleS/FleR  
94 regulates multiple phenotypes such as production of pyocyanin and elastase and mediates  
95 SDS response in addition to biofilm formation and motility. Finally, we presented  
96 evidence that FleR directly interacts with target gene promoters to autoregulate its own  
97 expression and control flagellum biosynthesis. This study presented a comprehensive  
98 investigation on the regulation and biological functions of the TCS FleS/FleR and  
99 provided insights on TCS-regulated virulence-related traits in bacterial pathogens.

## 100 MATERIALS AND METHODS

### 101 Bacterial strains and growth conditions

102 *P. aeruginosa* strains and other bacteria used in this study are listed in the supplementary  
103 information Table S1. Unless otherwise indicated, *P. aeruginosa* wild type and its  
104 derivatives, and *Escherichia coli* strains were routinely grown at 37°C in either  
105 Luria-Bertani (LB) broth (tryptone 10g/L, yeast extract 5g/L, NaCl 10g/L) or  
106 corresponding agar medium. Antibiotics were added when necessary at the following  
107 concentrations: gentamicin, 50 µg/ml for *P. aeruginosa* and *E. coli*; kanamycin, 50 µg/ml

108 for *E. coli*; ampicillin, 100 µg/ml for *E. coli*. Bacterial cell density was determined by  
109 measuring optical density (OD) at the wavelength of 600 nm.

### 110 **Construction of mutants**

111 The pK18mobsacB plasmid was used to construct in-frame deletion mutants of *P.*  
112 *aeruginosa* as previously described (Feng et al., 2020). The plasmids and primers used in  
113 this study were listed in Table S1 and Table S2, respectively. For instance, to generate the  
114 *fleS* gene deletion mutant, 500-bp upstream and 500-bp downstream homologous arms of  
115 *fleS* were amplified by PCR using a specific primer pair (Table S2) with Pfu DNA  
116 polymerase (Vazyme, China). After digestion with BamHI and HindIII, the PCR products  
117 were cloned into the suicide vector pK18mobsacB, generating pK18-*fleS* for *fleS* deletion.  
118 The resultant construct pK18-*fleS* was introduced into the *P. aeruginosa* strain PAO1 with  
119 the helper plasmid pRK2013 by triparental mating. Recovered colonies were selected and  
120 streaked on LB agar plates containing 10% sucrose. Desired colonies were selected by its  
121 susceptibility to gentamicin and tolerance to sucrose and further confirmed by PCR and  
122 DNA sequencing.

### 123 **Complementation analysis**

124 For *in trans* complementation of mutants, the coding region of a gene was first amplified  
125 together with its native promoter from the PAO1 genome by PCR. The PCR product was  
126 cloned downstream of the *lac* promoter in the shuttle vector pBBR1-MCS5 after  
127 digestion by HindIII and BamHI. The resultant construct was verified by sequencing and  
128 then introduced into the corresponding PAO1 mutants by triparental mating. The  
129 complemented strains were confirmed by PCR analysis.

### 130 **Biofilm formation assay and quantification**

131 Biofilm formation assay was performed according to the method previously described  
132 with minor modifications (An et al., 2010). Briefly, overnight bacterial cultures were  
133 diluted to an optical density at 600 nm ( $OD_{600}$ ) of 0.002 with fresh LB broth. The diluted  
134 cultures (150  $\mu$ l) was transferred to 96-well polypropylene microliter plates and incubated  
135 at 37°C for the indicated periods of time. Bacterial cell density ( $OD_{600}$ ) was measured by  
136 a microplate reader (BioTek, USA). Bacterial cultures were carefully removed and the  
137 plates were washed three times with water. The biofilm cells bound to the walls of the  
138 plate were stained with 0.1% crystal violet (175  $\mu$ l) for 15 min at room temperature, and  
139 then rinsed three times with water. The plates were air dried at room temperature. For  
140 quantification, biofilms were suspended in 200  $\mu$ l of 95% ethanol and its absorbance at  
141 570 nm was measured with a microplate reader. The concentration values were  
142 normalized to the cell density of each sample ( $OD_{570}/OD_{600}$ ). All experiments were  
143 performed three times with six replicates.

### 144 **Motility assays**

145 The motility assays were performed as described previously by Rashid et al. (Rashid et al.  
146 2000) with minor modifications. For swimming motility, tryptone medium (10 g/L  
147 Tryptone, 5 g/L Yeast extract, 0.25 g/L Agar) was used. Swimming plates were dried at  
148 room temperature for about 10 min in a biosafety cabinet and then inoculated with 1  $\mu$ l  
149 bacterial cells from an overnight culture grown in LB broth at 37°C. The plates were then  
150 wrapped with Saran Wrap to prevent dehydration and incubated at 37°C for 14 h before  
151 measuring of motility. The medium used for swarming assay consists of 0.5% (wt/vol)  
152 agar, 8 g/L nutrient broth and 5 g/L glucose. Swarming plates were typically allowed to

153 dry at room temperature for forty minutes before being used. Swarming plate was  
154 inoculated with 1  $\mu$ l overnight bacterial culture and inoculated at 37°C for 16 h before  
155 measurement. All experiments were performed three times with triplicates.

#### 156 **Pyocyanin quantitation assay**

157 Pyocyanin concentration was determined as described by Welsh et al. (Welsh et al., 2015).  
158 Briefly, the bacterial cultures were centrifuged at 14,000 rpm after grown for 16 h in 3 ml  
159 of LB medium. The supernatants were collected and filtered to remove residue cells. The  
160 absorbance of the supernatant was measured at 695 nm. The concentration values were  
161 normalized to the cell density of each sample ( $OD_{695}/OD_{600}$ ). The experiments were  
162 performed three times with triplicates.

#### 163 **Elastase assay**

164 Elastase activity was assayed by elastin-Congo red (Sigma) assay with minor  
165 modifications (Ohman et al., 1980). Briefly, *P. aeruginosa* and its derivatives were grown  
166 in 3 ml LB medium at 37 °C for 16 h with shaking at 200 rpm. 500  $\mu$ l aliquot of bacterial  
167 supernatants was added to an equal volume of 5 mg/ml elastin-Congo red in ECR buffer  
168 and incubated for 3 h at 37 °C. The amount of Congo red dye released from the digested  
169 elastin was determined using a spectrophotometer at A520, which is proportional to the  
170 activity of elastase in the supernatant. The activity values were normalized to the cell  
171 density of each sample ( $OD_{520}/OD_{600}$ ). All experiments were performed three times with  
172 triplicates.

#### 173 **RNA extraction, RT-PCR and quantitative real-time PCR**



174 *P. aeruginosa* and its derivatives were grown in LB medium until the OD<sub>600</sub> reached 1.5.  
175 Total RNA was isolated using the RNeasy mini kit (Qiagen, Germany) according to the  
176 manufacturer's instructions. The cDNA samples were synthesized from the isolated total  
177 RNA using SuperScript II reverse transcriptase (Invitrogen, USA) and random primers  
178 (Invitrogen, USA). RT-PCR was performed on ProFlex™ PCR (Thermo Fisher Scientific,  
179 USA) using DNA polymerase (QingkeBiotech, China). The same corresponding batch of  
180 cDNA was used for quantitative real-time PCR (qRT-PCR) analysis. qRT-PCR was  
181 performed using the QuantiTect SYBR Green PCR kit (Qiagen, Germany) on the ABI  
182 QuantStudio™<sup>6</sup> Flex system (Roche, Switzerland) according to the manufacturer's  
183 instructions. The primers used in this experiment were listed in Table S2. The experiment  
184 was repeated three times with triplicates.

#### 185 **RNA-seq analysis**

186 The enriched mRNA was fragmented as 200-700 nt and reverse transcribed into cDNA  
187 with random primers. Second-strand cDNA was synthesized by DNA polymerase I,  
188 RNase H, dNTP, and buffer. Then the cDNA fragments were purified with QiaQuick PCR  
189 extraction kit with end repaired and poly (A) added and ligated to Illumina sequencing  
190 adapters. The ligation products were size selected by agarose gel electrophoresis,  
191 followed by PCR amplification, and sequencing by Illumina HiSeq™ 2500 (Gene  
192 Denovo Biotechnology Co., China). Differentially expressed genes with  $\geq 1.2$ -Log<sub>2</sub>fold  
193 changes were identified at a false discovery rate (FDR)  $\leq 0.05$ , and analyzed using the  
194 major public pathway-related database KEGG (Kanehisa et al., 2008). The calculating  
195 formula for *p* value is

$$P = 1 - \sum_{i=0}^{n-1} \left( \frac{\binom{M}{i} \binom{N-M}{n-i}}{\binom{N}{n}} \right)$$

196

197 where N is the number of all genes that with annotation in database, n is the number of  
198 differentially expressed genes in N, M is the number of all genes annotated to specific  
199 pathways, and m is the number of differentially expressed genes in M. The calculated *p*  
200 value was gone through FDR correction, taking  $FDR \leq 0.05$  as a threshold. Q value is the  
201 *p* value underwent multiple hypothesis test corrections. The value ranges from 0 to 1 with  
202 more significant when it is closer to 0.

### 203 **SDS-induced macroscopic aggregation**

204 The experiment was performed as described previously (Chen et al., 2020). Briefly,  
205 overnight cultures of bacterial strains were diluted (1:100) into 1.5 ml M9 medium (6.78  
206 g/L Na<sub>2</sub>HPO<sub>4</sub>, 3 g/L KH<sub>2</sub>PO<sub>4</sub>, 0.5 g/L NaCl, 1.0 g/L NH<sub>4</sub>Cl) containing 3.5 mM SDS and  
207 cultured in 12-well plates with shaking at 120 rpm for 18 h at 30°C. Cell aggregation was  
208 quantified by measuring the size of bacterial aggregation. All experiments were  
209 performed three times with triplicates.

### 210 **Protein expression and purification**

211 The open reading frame of *fleR* was amplified with the primers listed in Table S2, and  
212 subcloned into the expression vector pGEX-6p-1. The resulting construct was  
213 transformed into *E. coli* strain BL21 for FleR expression. The glutathione-Sepharose 4B  
214 beads (Smart life, China) were used for the purification of the GST-FleR fusion following  
215 the methods described previously (An et al., 2010). GST-tag cleavage was conducted

216 with PreScission Protease (SMART Lifesciences, China; 2 units/  $\mu$ l of bound proteins) at  
217 4°C for 16 h. The obtained FleR protein was collected and analyzed by SDS-PAGE.

### 218 **Electrophoretic gel mobility shift assay**

219 The DNA probes used for electrophoretic gel mobility shift assay (EMSA) were prepared  
220 by PCR amplification using the primer pairs listed in Table S2. The purified PCR  
221 products were 3'-end-labelled with biotin following the manufacturer's instruction  
222 (Thermo Fisher Scientific, USA). The DNA-protein binding reactions were performed  
223 according to the manufacturer's instructions (Thermo Fisher Scientific, USA). The 4%  
224 polyacryl gel was used to separate the DNA-protein complexes. After UV cross-linking,  
225 the biotin-labeled probes were detected in the membrane using a biotin luminescent  
226 detection kit (Thermo Fisher Scientific, USA). The EMSA experiment was performed  
227 three times.

### 228 **Statistical analysis**

229 Experimental data were analyzed by one-way analysis of variance (ANOVA) and means  
230 were compared by Bonferron's multiple comparison test using Graphpad Prism software  
231 (version 8). Experiments were arranged as completely randomized design and differences  
232 at  $p < 0.05$  were considered as statistically significant.

233

## 234 **RESULTS**

### 235 **FleS and FleR are involved in the regulation of biofilm formation and motility**

236 To understand the role of FleS/FleR in regulating bacterial virulence, we generated the

237 *fleR* and *fleS* in-frame deletion mutants of *P. aeruginosa* strain PAO1. We first evaluated  
238 whether deletion of *fleS* and *fleR* would affect bacterial growth. We measured growth  
239 curves of the wild-type PAO1,  $\Delta$ *fleS*,  $\Delta$ *fleR* and their corresponding complemented strains  
240 and the result showed that there is no significant difference among these strains (Fig. S1).  
241 Next, a time-course analysis of biofilm formation was performed over a period of 30 h  
242 (Fig. 1A). It was shown that the biofilm biomass of the wild-type PAO1 was increased  
243 and reached a maximum amount at the time point of 10 h followed by a progressive  
244 decrease (biofilm decay). Compared to the wild type, deletion of *fleR* showed decreased  
245 biofilm biomass at all time points, whereas deletion of *fleS* produced same amounts of  
246 biofilm as the wild type at the first 6 h but its biofilm decay was observed about 4 h  
247 earlier. We then examined the impact of *fleS* and *fleR* on cell motility. The result showed  
248 that the swarming motility was reduced substantially in both  $\Delta$ *fleS* and  $\Delta$ *fleR* strains,  
249 however, deletion of *fleS* only moderately reduced swimming motility which was also  
250 substantially reduced by the deletion of *fleR* (Fig. 1B, 1C). *In trans* expression of  
251 wild-type *fleS* and *fleR* in the corresponding mutants rescued biofilm formation,  
252 swarming and swimming motility to wild-type levels (Fig. 1A-1C). These results  
253 indicated that FleS and FleR are involved in modulating biofilm formation and motility,  
254 and FleR plays more critical role than FleS. These findings were similar but not identical  
255 to the results of a previous study which showed that deletion of either *fleS* or *fleR* in  
256 PAO1 led to significant reductions in both swimming and swarming motility (Gellatly et  
257 al., 2019). We speculated that such differences may be due to the genetic dissimilarity  
258 occurred in different PAO1 sublines (Klockgether et al., 2010).

259 **FleS and FleR constitute a two-component regulatory system**

260 In PAO1, *fleS* and *fleR* are separated only by 4 base pairs and transcribed with the same  
261 orientation (Fig. 2A), suggesting that they are transcriptionally coupled and functionally  
262 related. Domain structure prediction using SMART program  
263 (<http://smart.embl-heidelberg.de/>) showed that the *fleS* gene encodes a protein with 402  
264 amino acids, containing a PAS domain, a histidine kinase domain, and a histidine  
265 kinase-like ATPase domain. However, unlike typical TCS sensor kinases, the predicted  
266 FleS lacks a transmembrane domain (Fig. 2A). Different with the ubiquitous response  
267 regulators which contain REC-HTH domains only, FleR is relatively large in size with  
268 473 amino acids containing REC-AAA-HTH domains (Fig. 2A). Reverse transcription  
269 polymerase chain reaction (RT-PCR) analysis confirmed that these two genes belong to  
270 the same operon (Fig. 2B).

271 To further confirm *fleS* and *fleR* are TCS pairs, we generated heterologously  
272 complemented strains  $\Delta fleR(fleS)$  and  $\Delta fleS(fleR)$  and examined its biofilm formation at  
273 10 h and swimming motility. The results exhibited that *in trans* expression of *fleR* in  
274  $\Delta fleS$  but not *fleS* in  $\Delta fleR$  restored its biofilm formation (Fig. 3A) and swimming  
275 motility (Fig. 3B). Moreover, we tested the *in trans* expression of *fleS* and *fleR* in the  
276 double deletion mutant  $\Delta fleS\Delta fleR$ , respectively, and the result showed that expression of  
277 *fleS* in the mutant  $\Delta fleS\Delta fleR$  failed to restore its capacity of biofilm formation and  
278 swimming motility while expression of *fleR* fully restored its biofilm formation and  
279 swimming motility to wild-type levels (Fig. 3A, 3B). Combined, these findings verified  
280 that FleS and FleR are TCS pairs and FleR is the cognate response regulator of the sensor  
281 kinase FleS.

282 **FleR controls the transcription of a wide range of genes belonging to diverse**

## 283 pathways in PAO1

284 In attempt to comprehensively understand the regulon of the TCS FleS/FleR, we analyzed  
285 and compared the transcriptomes of the wild-type PAO1 strain and its isogenic mutant  
286  $\Delta fleR$ . Considering that the obvious difference in biofilm formation of these two strains  
287 was observed between the time points 2 and 6 h (Fig. 1A), we collected the bacterial cells  
288 after 4-h growth for RNA-seq analysis. A total of 440 genes were identified with more  
289 than 1.2- $\log_2$ fold changes in expression. Specifically, 121 genes were downregulated and  
290 319 were upregulated by the deletion of *fleR* (Table S3). Overall, KEGG analysis  
291 revealed that the differentially expressed genes could be clustered into 20 functional  
292 groups (Fig. 4A). As summarized in Table 1, most identified genes with significant  
293 expression changes are virulence-related genes, e.g. genes involved in siderophore  
294 biosynthesis, pyocyanin biosynthesis, type III/VI secretion systems, c-di-GMP  
295 metabolism, flagellar assembly *etc.* Expression of these genes were subjected to  
296 verification by qRT-PCR (Fig. S2, S3). Given that flagellum and c-di-GMP are essential  
297 for motility and biofilm formation, respectively (Kearns et al., 2010; Merritt et al., 2007;  
298 Jones et al., 2014), the identification of flagellum biosynthesis genes and c-di-GMP  
299 metabolism genes in the RNA-seq result explains the connections of FleR with biofilm  
300 formation and motility.

301 Since transcriptome analysis strongly suggested the regulatory role of FleR in bacterial  
302 virulence, we next selectively examined productions of two major virulence factors, i.e.  
303 pyocyanin and elastase, in *P. aeruginosa*. Our results showed that pyocyanin production

304 was only reduced in the *fleR* deletion mutant, whereas no obvious change was observed  
305 in the *fleS* deletion mutant (Fig. 5A), suggesting that regulation of pyocyanin production  
306 by FleR is independent of FleS. Interestingly, deletion of either *fleS* or *fleR* resulted in  
307 increased elastase production (Fig. 5B), suggesting that elastase in PAO1 is negatively  
308 regulated by FleS/FleR. *In trans* expression of wild-type *fleS* and *fleR* in the  
309 corresponding *fleS* and *fleR* deletion mutants restored pyocyanin and elastase productions  
310 to the wild-type levels (Fig. 5). Together, these results expanded our understanding on the  
311 regulatory spectrum of FleS/FleR and confirmed our hypothesis that the TCS FleS/FleR  
312 is involved in the regulation of different virulence traits in addition to motility and  
313 biofilm formation.

#### 314 **FleS and FleR influence the SDS-induced cell aggregation**

315 It has been reported that toxic chemicals, such as antibiotics and detergents, can trigger  
316 formation of bacterial cell aggregation which is a bacterial stress response mechanism  
317 because aggregated cells are more resistant to biocides than planktonic cells (Drenkard et  
318 al., 2003; Gotoh et al., 2008). This phenomenon was also reported in *P. aeruginosa* when  
319 it grown in the presence of the detergent SDS (Klebensberger et al., 2006 and 2007). It  
320 was shown that aggregated cells exhibited higher survival rate after exposure to SDS than  
321 the planktonic cells and the *siaA-D* operon was essential for the SDS-induced formation  
322 of cell aggregation (Klebensberger et al., 2007 and 2009). Interestingly, our RNA-seq  
323 result and qRT-PCR verification showed that the expression of *siaA-D* genes was  
324 significant reduced in the mutant  $\Delta fleR$  (Fig. 6A, Table S3), suggesting that the TCS  
325 FleS/FleR is involved in the adaptation to SDS stress. We next moved to examine  
326 whether FleS/FleR mediates SDS-induced cell aggregation and found that deletion of

327 either *fleS* or *fleR* indeed substantially reduced formation of cell aggregation (Fig. 6B). In  
328 addition, the corresponding complemented strains displayed the fully restored phenotype  
329 of cell aggregation, confirming that the TCS FleS/FleR mediates the SDS-induced cell  
330 aggregation in PAO1.

### 331 **FleR autoactivates the expression of *fleSR***

332 Some TCSs are found to autoregulate their own expression such as MisR/MisS in  
333 *Neisseria meningitidis* (Tzeng et al., 2006), PhoP/PhoQ in *Salmonella typhimurium*  
334 (Newcombe et al., 2004), and CpxR/CpxA in *Escherichia coli* (De et al., 1999). To  
335 understand whether FleS/FleR also autoregulates its own expression, we then examined  
336 the expression of *fleS* and *fleR* in the mutants  $\Delta fleR$  and  $\Delta fleS$ , respectively. Interestingly,  
337 the expression of *fleR* was significantly increased in the *fleS* deletion mutant while the  
338 expression of *fleS* was significantly reduced in the *fleR* deletion mutant (Fig. 7A),  
339 suggesting that FleR can autoregulate the transcriptional expression of itself, i.e. *fleSR*  
340 operon. FleS/FleR autoregulation was further validated by the EMSA assay which  
341 examines the binding between FleR and the promoter of *fleSR* (308-bp upstream region  
342 of the *fleS* start codon, Fig. 7B). As shown in Fig. 7C, the *fleSR* promoter DNA (*PfleSR*)  
343 formed a stable DNA-FleR complex with FleR which migrated at a slower rate than the  
344 free probes. Unlabeled probe added in the reaction mix could competitively reduce the  
345 amount of labeled DNA in the DNA-FleR complex (Fig. 7C), confirming the specific  
346 interaction between the *fleSR* promoter and FleR. These results demonstrated that FleR  
347 could autoactivate *fleSR* transcription.



348 **FleR regulates flagellum gene expression by direct and specific binding to their**  
349 **promoters**

350 Since our RNA-seq result has suggested that FleR influences bacterial motility by  
351 modulating its flagellum biosynthesis, we next sought to understand how FleR regulates  
352 the expression of flagellum biosynthesis genes in PAO1. Flagellum biogenesis is known  
353 to be controlled by a series of genes in a four-tiered transcriptional regulatory circuit, i.e.  
354 *fleQ* in class I, *fleSR*, *flhFfleN*, *fliEFGHIJ*, *fliLMNOPQR*, *flhB*, *flhA* and *flgA* in class II,  
355 *flgBCDE*, *flgFGHIJKL* and *fliK* in class III, and *fliC*, *fleL*, *cheAB*, *motAB*, *cheW*, *cheVR*,  
356 *flgMN* and *cheYZ* in class VI (Dasgupta et al., 2003). According to our RNA-seq and  
357 qRT-PCR results, the expression of class III and IV genes including *flgBCDE*,  
358 *flgFGHIJKL*, *fliK*, *flgMN* and *fliC* was reduced by the absence of *fleR* (Table 1, Table S3,  
359 Fig. S3B). We thus conducted EMSA assays to examine whether FleR potentially binds  
360 to the promoters of class III and IV genes. The results displayed that the promoters of  
361 *flgBCDE*, *flgFGHIJKL* and *fliC* from the above two classes could form stable complexes  
362 with FleR, and the detected interaction signals of FleR with these labeled promoters were  
363 enhanced along with the increased levels of FleR and reduced with unlabeled promoters  
364 (Fig. 8A, 8B). However, the promoters of *fliK* and *flgMN*, which belong to class III and  
365 class IV, respectively, could not form complex with FleR (Fig 8A). Together, these results  
366 indicated that FleR directly controls the transcription of *flgBCDE*, *flgFGHIJKL* and *fliC*  
367 by interacting with their promoters, and might indirectly modulate the transcription of  
368 *flgMN* and *fliK* through other transcription factors.

369 We also performed EMSA analysis to examine the potential interaction of FleR with the  
370 promoters of other virulence-related genes such as genes involved in pyocyanin  
371 biosynthesis and biofilm formation which are modulated by FleR. Two pyocyanin  
372 biosynthesis operons *phz1* and *phz2*, and two biofilm components Pel and Psl  
373 exopolysaccharides biosynthesis operons *pel* and *psl* were selected and subjected to  
374 EMSA analysis. However, no interaction between FleR and these promoters was  
375 observed (Fig. S4), suggesting that FleR might regulate pyocyanin production through  
376 modulation of other transcription factor(s) and control the biosynthesis of other  
377 component(s) necessary for biofilm formation.

## 378 **DISCUSSION**

379 Previous studies reported FleS/FleR might constitute a TCS and suggested its role in the  
380 control of bacterial motility through modulating flagellum biogenesis in *P. aeruginosa*  
381 (Ritchings et al., 1995; Dasgupta et al., 2003; Kollaran et al., 2019). Recently, *fleS* and  
382 *fleR* were also reported to regulate bacterial virulence (Gellatly et al., 2018). However,  
383 the regulatory spectrum and the biological functions of FleS/FleR are still largely  
384 unknown. In this study, we first showed that FleS and FleR are important to regulate  
385 biofilm formation and motility in PAO1 and validated that FleS and FleR constitute a  
386 TCS pair (Fig 1, 2 and 3). RNA-seq analysis identified that the expression level of over  
387 400 genes were significantly altered including most of them are virulence-related genes  
388 involved in siderophore biosynthesis, pyocyanin biosynthesis, type III/VI secretion  
389 systems, c-di-GMP metabolism, flagellar assembly *etc* (Table 1 and S3, Fig. S2, S3).  
390 Moreover, FleR was demonstrated to be essential to mediate stress response to SDS (Fig.  
391 6). Lastly, we showed that FleR could directly autoregulate the expression of *fleSR*

392 operon and control bacterial motility by regulating some class III and class IV flagellum  
393 biosynthesis genes through directly binding to their promoters (Fig. 7, 8). These findings  
394 largely enriched our understanding on the regulatory spectrum and biological roles of this  
395 important TCS in *P. aeruginosa*.

396 It is known that the single polar flagellum of *P. aeruginosa* plays an important role in the  
397 bacterial virulence and colonization (Montie et al., 1982; Fleiszig et al., 2001). A previous  
398 report revealed the biogenesis of flagellum in this opportunistic pathogen is governed by  
399 a four-tiered (Classes I-IV) hierarchy of transcriptional regulation (Dasgupta et al., 2003).  
400 Specifically, class I genes are constitutively expressed and include the genes encoding the  
401 transcriptional regulator FleQ and the alternative sigma factor FliA ( $\sigma^{28}$ ). Class II genes  
402 include those encoding TCSs such as FleS/FleR which require FleQ and RpoN ( $\sigma^{54}$ ) for  
403 their activation (Jyot et al., 2002). Class III genes are known to be positively regulated by  
404 the response regulator FleR in concert with RpoN, and the class IV gene *fliC* is controlled  
405 by FliA (Dasgupta et al., 2003). However, the detailed molecular mechanisms of FleR  
406 therein remains unclear. Our RNA-seq results showed that deletion of *fleR* significantly  
407 decreases the transcription levels of *flgBCDE*, *flgFGHIJKL*, *fliC*, *flgMN* and *fliK* which  
408 belong to the III and IV classes, respectively (Table 1, Fig. S3B). Subsequent EMSA  
409 analysis demonstrated that FleR regulates the expression of *flgBCDE*, *flgFGHIJKL* and  
410 *fliC* by directly binding to their promoters while regulates the expression of *flgMN* and  
411 *fliK* indirectly (Fig. 8). Therefore, our results not only provided the molecular evidence  
412 that how FleR modulates the expression of class III genes *flgBCDE* and *flgFGHIJKL*, but  
413 also revealed that FleR can directly control the expression of the class IV gene *fliC* and  
414 indirectly control the expression of additional flagellum synthesis genes, highlighting the

415 versatile roles of FleS/FleR in the regulation of flagellum biogenesis.

416 qRT-PCR and EMSA analysis indicated that FleR could bind to the promoter region of  
417 *fleSR* to activate its own expression (Fig. 7). Although autoregulation of TCS gene  
418 expression is found in several TCSs and their regulators have also been shown to bind to  
419 their cognate promoter DNA in their non-phosphorylated states such as AgrR in  
420 *Cupriavidus metallidurans* and the orphan response regulator in *Streptomyces coelicolor*  
421 (Roy et al., 1991; Holman et al., 1994; Liu et al., 1997; Hayde et al., 2002; Wang et al.,  
422 2009; Ali et al., 2020), gene transcription without the presence of their cognate sensor  
423 kinase is still rare. Interestingly, our study clearly showed that FleR plays a critical role in  
424 the activation of its own expression even in the absence of its kinase pair FleS. However,  
425 whether FleR can activate gene transcription in the non-phosphorylated state or it could  
426 be phosphorylated by other kinase requires further investigation. This is also a possible  
427 reason for the discordance in regulation of swimming motility and pyocyanin production  
428 by FleS and FleR. Given that FleR shares 39% identity with FleQ whose activity is  
429 affected by binding with c-di-GMP and interacting with FleN (Baraquet et al., 2013;  
430 Matsuyama et al., 2016), another reason for the activation of FleR without FleS is that  
431 FleR might use c-di-GMP or other signaling molecules or interact with other proteins as  
432 its activators. Moreover, when we looked into the consensus of promoter sequences of  
433 *flgBCDE*, *flgFGHIJKL*, *fliC* and *fleSR* which can be recognized by FleR, no conserved  
434 sequence motif among these promoters was found (Fig. S5), suggesting that FleR may

435 have different binding sites in the target gene promoter region. These findings also led us  
436 to speculate that the regulatory capacity of FleR requires cooperation with other  
437 transcriptional factors such as FleQ, RpoN and PilS/PilR (Jyot et al., 2002; Kilmury et al.,  
438 2018).

439 Over the past three decades, many TCSs from different microorganisms have been  
440 functionally characterized with elucidated mechanisms of phosphorylation and regulatory  
441 networks. However, identification of the environmental cues which activate various TCSs  
442 remains a challenge. Our RNA-seq result identified that the expression of *siaA-D*, which  
443 are essential for the SDS-induced formation of cell aggregation, were significantly  
444 reduced in the mutant  $\Delta fleR$ , suggesting that the TCS FleS/FleR may be associated with  
445 the response to SDS stress. Further analysis validated this speculation as deletion of  
446 either *fleS* or *fleR* resulted in reduced formation of bacterial cell aggregates. PAS domain  
447 is known to sense diverse intracellular and extracellular signals (Martinez-Argudo et al.,  
448 2001; Deng et al., 2012). For example, in *Burkholderia cenocepacia*, the quorum sensing  
449 signal BDSF binds to the PAS domain of RpfR with high affinity and activate its  
450 phosphodiesterase activity through induction of conformational changes (Deng et al.,  
451 2012; Waldron et al., 2019). It is interesting to note that FleS of PAO1 also contains a  
452 PAS domain but lacks transmembrane domain, so, it is possible that FleS may perceive  
453 intracellular SDS molecules to mediate cell aggregation. However, structural evidence to  
454 show the direct interaction of FleS-PAS with SDS is still required.

## 455 CONCLUSIONS

456 In summary, this study presented a systematic investigation on the regulation and

457 functional roles of the TCS FleS/FleR in *P. aeruginosa*. RNA-seq and phenotype analyses  
458 showed that FleS/FleR modulates multiple physiological pathways, including biofilm  
459 formation, motility, production of virulence factors, and SDS responsive cell aggregation,  
460 highlighting its essential roles in bacterial pathogenicity and adaptation. The molecular  
461 mechanisms of FleR in regulating flagellum biosynthesis genes and its own *fleSR* operon  
462 were demonstrated. These findings largely enriched our understanding on the spectrum  
463 and mechanisms of FleS/FleR in the regulation of bacterial physiology and virulence.

464

#### 465 **AUTHOR CONTRIBUTIONS**

466 LZ and TZ designed the experiment. TZ, JH, QF, ZL and QL performed the experiment.  
467 TZ analyzed the data. TZ, ZX, and LZ wrote the manuscript.

468

#### 469 **FUNDING**

470 This work was supported by the Key Projects of Guangzhou Science and Technology  
471 Plan (Grant No.: 201804020066), Natural Research Foundation of China (Grant No.:  
472 31330002), Guangdong Technological Innovation Strategy of Special Funds (Grant No.:  
473 2018B020205003).

474

#### 475 **CONFLICT OF INTEREST STATEMENT**

476 The authors declare that they have no conflicts of interest with the contents of this article.

477

478 **REFERENCES**

- 479 Ahator, S. D., and Zhang, L. H. (2019). Small is mighty-chemical communication  
480 systems in *Pseudomonas aeruginosa*. *Annu. Rev. Microbiol.* 73, 559–578. doi:  
481 10.1146/annurev-micro-020518-120044
- 482 Ali, M. M., Provoost, A., Mijndonckx, K., Houdt, R. V., and Charlier, D. (2020).  
483 DNA-Binding and transcription activation by unphosphorylated response regulator  
484 AgrR from *Cupriavidus metallidurans* involved in silver resistance. *Front.*  
485 *Microbiol.* 11, 1635. doi: 10.3389/fmicb.2020.01635
- 486 An, S., Wu, J., and Zhang, L. (2010). Modulation of *Pseudomonas aeruginosa* biofilm  
487 dispersal by a cyclic-di-GMP phosphodiesterase with a putative hypoxia-sensing  
488 domain. *Appl. Environ. Microbiol.* 76, 8160-8173. doi: 10.1128/AEM.01233-10
- 489 Baraquet, B., and Harwood, C. S. (2013). Cyclic diguanosine monophosphate represses  
490 bacterial flagella synthesis by interacting with the Walker A motif of the  
491 enhancer-binding protein FleQ. *Proc. Natl. Acad. Sci. U.S.A.* 110, 18478-83. doi:  
492 10.1073/pnas.1318972110
- 493 Brencic, A., McFarland, K. A., McManus, H. R., Castang, S., Mogno, L., Dove, S. L.,  
494 and Lory, S. (2009). The GacS/GacA signal transduction system of *Pseudomonas*  
495 *aeruginosa* acts exclusively through its control over the transcription of the RsmY  
496 and RsmZ regulatory small RNAs. *Mol. Microbiol.* 73, 434–445. doi:  
497 10.1111/j.1365-2958.2009.06782.x
- 498 Caiazza, N. C., Shanks, R. M., and O’Toole, G. A. (2005). Rhamnolipids modulate  
499 swarming motility patterns of *Pseudomonas aeruginosa*. *J. Bacteriol.* 187,  
500 7351–7361. doi: 10.1128/JB.187.21.7351-7361.2005
- 501 Chen, G. K., Gan, J. H., Yang, C., and Zuo, Y. L. (2020). The SiaA/B/C/D signaling  
502 network regulates biofilm formation in *Pseudomonas aeruginosa*. *EMBO J.* 39:

- 503 e105997. doi: 10.15252/embj.2020105997
- 504 Costerton, J. W., Lewandowski, Z., Caldwell, D. E., Korber, D. R., and Lappin-Scott, H.  
505 M. (1995). Microbia biofilms. *Annu. Rev. Microbiol.* 49, 711-745. doi:  
506 10.1146/annurev.mi.49.100195.003431
- 507 Dasgupta, N., Wolfgang, M. C., and Goodman, A. L. (2003). A four-tiered transcriptional  
508 regulatory circuit controls flagellar biogenesis in *Pseudomonas aeruginosa*. *Mol.*  
509 *Microbiol.* 50, 809-824. doi: 10.1046/j.1365-2958.2003.03740.x
- 510 De, W. P., Kwon, O., and Lin, E. C. (1999). The CpxRA signal transduction system of  
511 *Escherichia coli*: growth-related autoactivation and control of unanticipated target  
512 operons. *J. Bacteriol.* 181, 6772-6778. doi: 10.1128/JB.181.21.6772-6778.1999
- 513 Deng, Y. Y., Schmid, N., Wang, C., Wang, J., and Zhang, L. H. (2012). Cis-2-dodecenoic  
514 acid receptor RpfR links quorum-sensing signal perception with regulation of  
515 virulence through cyclic dimeric guanosine monophosphate turnover. *Proc. Natl.*  
516 *Acad. Sci. U.S.A.* 109, 15479-84. doi :10.1073/pnas.1205037109
- 517 Deretic, V., Dikshit, R., Konyecsni, W. M., Chakrabarty, A. M., and Misra, T. K. (1989).  
518 The *algR* gene, which regulates mucoidy in *Pseudomonas aeruginosa*, belongs to a  
519 class of environmentally responsive genes. *J. Bacteriol.* 171, 1278-1283. doi:  
520 10.1128/jb.171.3.1278-1283.1989
- 521 Deretic, V., Schurr, M. J., and Yu, H. W. (1995). *Pseudomonas aeruginosa*, mucoidy and  
522 the chronic infection phenotype in cystic fibrosis. *Trends Microbiol.* 3, 351-356. doi:  
523 10.1016/S0966-842X(00)88974-X
- 524 Dong, Y. H., Zhang, X. F., An, S. W., Xu, J. L., Zhang, L. H. (2008). A novel  
525 two-component system BqsS-BqsR modulates quorum sensing-dependent biofilm  
526 decay in *Pseudomonas aeruginosa*. *Commun. Integr. Biol.* 1, 88-96. doi:  
527 10.4161/cib.1.1.6717



- 528 Drake, D., and Montie, T. C. (1988). Flagella, motility and invasive virulence of  
529 *Pseudomonas aeruginosa*. *J. Gen. Microbiol.* 134, 43-52. doi:  
530 10.1099/00221287-134-1-43
- 531 Drenkard, E. (2003). Antimicrobial resistance of *Pseudomonas aeruginosa* biofilms.  
532 *Microbes Infect.* 5, 1213-1219. doi: 10.1016/j.micinf.2003.08.009
- 533 Feng, Q. S., Ahator, S. D., Zhou, T., Liu, Z. Q., Lin, Q. Q., Liu, Y., et al. (2020).  
534 Regulation of exopolysaccharide production by ProE, a cyclic-di-GMP  
535 phosphodiesterase in *Pseudomonas aeruginosa* PAO1. *Front. Microbiol.* 11, 1226.  
536 doi: 10.3389/fmicb.2020.01226
- 537 Fleiszig, S. M., Arora, S. K., Van, R., and Ramphal, R. (2001). FlhA, a component of the  
538 flagellum assembly apparatus of *Pseudomonas aeruginosa*, plays a role in  
539 internalization by corneal epithelial cells. *Infect. Immun.* 69, 4931-4937. doi:  
540 10.1128/IAI.69.8.4931-4937.2001
- 541 Galperin, M. Y. (2006). Structural classification of bacterial response regulators: diversity  
542 of output domains and domain combinations. *J. Bacteriol.* 188, 4169-4182. doi:  
543 10.1128/JB.01887-05
- 544 Gellatly, S. L., Bains, M., Breidenstein, E. B., Strehmel, J., Reffuveille, F., Taylor, P. K.,  
545 et al. (2018). Novel roles for two-component regulatory systems in cytotoxicity and  
546 virulence-related properties in *Pseudomonas aeruginosa*. *AIMS Microbiol.* 4,  
547 173–191. doi: 10.3934/microbiol.2018.1.173
- 548 Gotoh, H., Zhang, Y., Dallo, S. F., Hong, S., Kasaraneni, N., and Weitao, T. (2008).  
549 *Pseudomonas aeruginosa*, under DNA replication inhibition, tends to form biofilms  
550 via Arr. *Res. Microbiol.* 159, 294-302. doi: 10.1016/j.resmic.2008.02.002
- 551 Hayde, S. E., Benjamin, W. H. J., Dunlap, N. E., and Clark-Curtiss, J. E. (2002).  
552 Expression, autoregulation, and DNA binding properties of the *Mycobacterium*

- 553 *tuberculosis* TrcR response regulator. *J. Bacteriol.* 184, 2192-2203. doi:  
554 10.1128/JB.184.8.2192-2203.2002
- 555 He, Y. W., Boon, C., Zhou, L., and Zhang, L. H. (2009). Co-regulation of *Xanthomonas*  
556 *campestris* virulence by quorum sensing and a novel two-component regulatory  
557 system RavS/RavR. *Mol. Microbiol.* 71, 1464–1476. doi:  
558 10.1111/j.1365-2958.2009.06617.x
- 559 He, Y. W., Wang, C., Zhou, L., Song, H. W., Dow, J. M., and Zhang, L. H. (2006). Dual  
560 signaling functions of the hybrid sensor kinase rpfC of *Xanthomonas campestris*  
561 involve either phosphorelay or receiver domain-protein interaction. *J. Biol. Chem.*  
562 281, 33414–33421. doi.: 10.1074/jbc.M606571200
- 563 He, Y. W., and Zhang, L. H. (2008). Quorum sensing and virulence regulation in  
564 *Xanthomonas campestris*. *FEMS Microbiol. Rev.* 32, 842-57. doi:  
565 10.1111/j.1574-6976.2008.00120.x
- 566 Holman, T. R., Wu, Z., Wanner, B. L., and Walsh. C. T. (1994). Identification of the  
567 DNA-binding site for the phosphorylated vanR protein required for vancomycin  
568 resistance in *Enterococcus faecium*. *Biochemistry* 33, 4625-4631. doi:  
569 10.1021/bi00181a024
- 570 Jones, C. J., Newsom, D., Kelly, B., and Irie, Y., and Wozniak, D. J. (2014). ChIP-Seq  
571 and RNA-Seq reveal an AmrZ-mediated mechanism for cyclic di-GMP synthesis  
572 and biofilm development by *Pseudomonas aeruginosa*. *PLoS Pathog.* 10: e1003984.  
573 doi: 10.1371/journal.ppat.1003984
- 574 Jyot, J., Dasgupta, N., and Ramphal, R. (2002). FleQ, the major flagellar gene regulator  
575 in *Pseudomonas aeruginosa*, binds to enhancer sites located either upstream or  
576 atypically downstream of the RpoN binding site. *J. Bacteriol.* 184, 5251-5260. doi:  
577 10.1128/JB.184.19.5251-5260.2002

- 578 Kanehisa, M., Araki, M., Goto, S., Hattori, M., Hirakawa, M., and Itoh, M. (2008).  
579 KEGG for linking genomes to life and the environment. *Nucleic Acids Research*.  
580 36, D480-D484. doi: 10.1093/nar/gkm882
- 581 Kay, E., Humair, B., Denervaud, V., Riedel, K., Spahr, S., Eberl, L., et al. (2006). Two  
582 GacA-dependent small RNAs modulate the quorum-sensing response in  
583 *Pseudomonas aeruginosa*. *J. Bacteriol.* 188, 6026-6033. doi: 10.1128/JB.00409-06
- 584 Kearns, D. B. (2010). A field guide to bacterial swarming motility. *Nat. Rev. Microbiol.* 8,  
585 634-44. doi: 10.1038/nrmicro2405
- 586 Kilmury, S. L., and Burrows, L. L. (2018). The *Pseudomonas aeruginosa* PilSR  
587 two-component system regulates both twitching and swimming motilities. *mBio* 24:  
588 e01310-18. doi: 10.1128/mBio.01310-18
- 589 Klebensberger, J., Birkenmaier, A., Geffers, R., Kjellebergand, S., and Philipp, B. (2009).  
590 SiaA and SiaD are essential for inducing autoaggregation as a specific response to  
591 detergent stress in *Pseudomonas aeruginosae*. *Environ. Microbiol.* 11, 3073-3086.  
592 doi: 10.1111/j.1462-2920.2009.02012.x
- 593 Klebensberger, J., Lautenschlager, K., Bressler, D., Wingender, J., and Philipp, B. (2007).  
594 Detergent-induced cell aggregation in subpopulations of *Pseudomonas aeruginosa*  
595 as a preadaptive survival strategy. *Environ. Microbiol.* 9, 2247-2259. doi:  
596 10.1111/j.1462-2920.2007.01339.x
- 597 Klebensberger, J., Rui, O., Fritz, E., Schink, B., and Philipp, B. (2006). Cell aggregation  
598 of *Pseudomonas aeruginosa* strain PAO1 as an energy-dependent stress response  
599 during growth with sodium dodecyl sulfate. *Arch. Microbiol.* 185, 417-427. doi:  
600 10.1007/s00203-006-0111-y
- 601 Klockgether, J., Munder, A., Neugebauer, J., and Davenport, C. F. (2010). Genome  
602 diversity of *Pseudomonas aeruginosa* PAO1 laboratory strains. *J. Bacteriol.* 192,

- 603 1113-21. doi: 10.1128/JB.01515-09
- 604 Kohler, T., Curty, L. K., Barja, F., Delden, C., and Pechere, J. C. (2000). Swarming of  
605 *Pseudomonas aeruginosa* is dependent on cell-to-cell signaling and requires flagella  
606 and pili. *J. Bacteriol.* 182, 5990–5996. doi: 10.1128/JB.182.21.5990-5996.2000
- 607 Kollaran, A. M., Joge, S., Kotian, H. S., Badal, D., Prakash, D., Mishra, A., et al. (2019).  
608 Context-specific requirement of forty-four two-component loci in *Pseudomonas*  
609 *aeruginosa* swarming. *iScience* 13, 305-317. doi: 10.1016/j.isci.2019.02.028
- 610 Lai, S., Tremblay, J., and Deziel, E. (2009). Swarming motility: a multicellular behaviour  
611 conferring antimicrobial resistance. *Environ. Microbiol.* 11, 126–136. doi:  
612 10.1111/j.1462-2920.2008.01747.x
- 613 Lee, J., and Zhang, L. H. (2015). The hierarchy quorum sensing network in *Pseudomonas*  
614 *aeruginosa*. *Protein. Cell.* 6, 26-41. doi: 10.1007/s13238-014-0100-x
- 615 Liu, W., and Hulett, F. M. (1997). *Bacillus subtilis* PhoP binds to the *phoB* tandem  
616 promoter exclusively within the phosphate starvation-inducible promoter. *J.*  
617 *Bacteriol.* 179, 6302-6310. doi: 10.1128/jb.179.20.6302-6310.1997
- 618 Lyczak, J. B., Cannon, C. L., and Pier, G. B. (2002). Lung infections associated with  
619 cystic fibrosis. *Clin. Microbiol. Rev.* 15, 194-222. doi:  
620 10.1128/CMR.15.2.194–222.2002
- 621 Martinez-Argudo, I., Martin-Nieto, J., Salinas, P., Maldonado, R., Drummond, M.,  
622 Contreras, A. (2001). Two-hybrid analysis of domain interactions involving NtrB  
623 and NtrC two-component regulators. *Mol. Microbiol.* 40, 169-178.  
624 doi:10.1046/j.1365-2958.2001.02369.x
- 625 Matsuyama, B. Y., Krasteva, P. V., Baraquet, C., Harwood, C. S., Sondermann, H., and  
626 Navarro, M. V. (2016). Mechanistic insights into c-di-GMP-dependent control of the  
627 biofilm regulator FleQ from *Pseudomonas aeruginosa*. *Proc. Natl. Acad. Sci. U.S.A.*

- 628 113, E209-18. doi:10.1073/pnas.1523148113
- 629 Merritt, J. H., Brothers, K. M., Kuchma, S. L., and O'Toole, G. A. (2007). SadC  
630 reciprocally influences biofilm formation and swarming motility via modulation of  
631 exopolysaccharide production and flagellar function. *J. Bacteriol.* 189, 8154-64.  
632 doi:10.1128/JB.00585-07
- 633 Montie, T. C., Doyle-Huntzinger, D., Craven, R. C., and Holder, I. A. (1982). Loss of  
634 virulence associated with absence of flagellum in an isogenic mutant of  
635 *Pseudomonas aeruginosa* in the burned-mouse model. *Infect. Immun.* 38, 1296-1298.  
636 doi: 10.1128/IAI.38.3.1296-1298.1982
- 637 Newcombe, J., Eales-Reynolds, L., and Wootton, L. (2004). Infection with an avirulent  
638 *phoP* mutant of *Neisseria meningitidis* confers broad cross-reactive immunity. *Infect.*  
639 *Immun.* 72, 338-344. doi: 10.1128/IAI.72.1.338-344.2004
- 640 Ohman, D. E., Cryz, S. J., and Iglewski, B. H. (1980). Isolation and characterization of a  
641 *Pseudomonas aeruginosa* PAO mutant that produces altered elastase. *J. Bacteriol.*  
642 142, 836-842. doi: 10.1128/JB.142.3.836-842.1980
- 643 Overhage, J., Bains, M., Brazas, M. D., and Hancock, R. E. (2008). Swarming of  
644 *Pseudomonas aeruginosa* is a complex adaptation leading to increased production of  
645 virulence factors and antibiotic resistance. *J. Bacteriol.* 190, 2671-2679. doi:  
646 10.1128/JB.01659-07
- 647 Quinn, J. P. (2003). *Pseudomonas aeruginosa* infections in the intensive care unit. *Semin.*  
648 *Respir. Crit. Care. Med.* 24, 61-68. doi: 10.1055/s-2003-37917
- 649 Rashid, M. H., and Kornberg, A. (2000). Inorganic polyphosphate is needed for  
650 swimming, swarming, and twitching motilities of *Pseudomonas aeruginosa*. *Proc*  
651 *Natl. Acad. Sci. U.S.A.* 97, 4885-9. doi: 10.1073/pnas.060030097
- 652 Ritchings, B. W., Almira, E. C., Lory, S., and Ramphal, R. (1995). Cloning and

- 653 phenotypic characterization of *fleS* and *fleR*, new response regulators of  
654 *Pseudomonas aeruginosa* which regulate motility and adhesion to mucin. *Infect.*  
655 *Immun.* 63, 4868-4876. doi: 10.1128/IAI.63.12.4868-4876.1995
- 656 Rodrigue, A., Quentin, Y., Lazdunski, A., Mejean, V., and Foglino, M. (2000).  
657 Two-component systems in *Pseudomonas aeruginosa*: why so many?. *Trends*  
658 *Microbiol.* 8, 498 –504. doi: 10.1016/s0966-842x(00)01833-3
- 659 Roy, C. R., and Falkow, S. (1991). Identification of *Bordetella pertussis* regulatory  
660 sequences required for transcriptional activation of the *fhaB* gene and autoregulation  
661 of the *bvgAS* operon. *J. Bacteriol.* 173, 2385-2392. doi:  
662 10.1128/JB.173.7.2385-2392.1991
- 663 Sousa, A. M., Pereira, M. O. (2014). *Pseudomonas aeruginosa* diversification during  
664 infection development in cystic fibrosis lungs-A Review. *Pathogens* 3, 680-703. doi:  
665 10.3390/pathogens3030680.
- 666 Tzeng, Y. L., Zhou, X. L., Bao, S. J., Zhao, S. M., Noble, C., and Stephens, D.S. (2006).  
667 Autoregulation of the MisR/MisS two-component signal transduction system in  
668 *Neisseria meningitidis*. *J. Bacteriol.* 188, 5055-5065. doi: 10.1128/JB.00264-06
- 669 Waldron, E. J., Snyder, D., Fernandez, N. L., Sileo, E., Inoyama, D., Freundlich, J. S., et  
670 al. (2019). Structural basis of DSF recognition by its receptor RpfR and its  
671 regulatory interaction with the DSF synthase RpfF. *Plos Biology* 17: e3000123.  
672 doi:10.1371/journal.pbio.3000123.
- 673 Wang, C., Ye, F. Z., Kumar, V., Gao, Y. G., and Zhang, L. H. (2014). BswR controls  
674 bacterial motility and biofilm formation in *Pseudomonas aeruginosa* through  
675 modulation of the small RNA *rsmZ*. *Nucleic. Acids. Res.* 42, 4563-4576. doi:  
676 10.1093/nar/gku106
- 677 Wang, J. H., Dong, Y. H., Zhou, T. L., Liu, X. L., Deng, Y. Y., Wang, C., et al. (2013).

678 *Pseudomonas aeruginosa* cytotoxicity is attenuated at high cell density and  
679 associated with the accumulation of phenylacetic acid. *PLoS One* 8:e60187. doi:  
680 10.1371/journal.pone.0060187

681 Wang, W. H., Shu, D., Chen, L., Jiang, W. H., and Lu, Y. H. (2009). Cross-talk between  
682 an orphan response regulator and a noncognate histidine kinase in *Streptomyces*  
683 *coelicolor*. *FEMS Microbiol. Lett.* 294, 150-6. doi:  
684 10.1111/j.1574-6968.2009.01563.x

685 Welsh, M. A., Eibergen, N. R., Moore, J. D., and Blackwell, H. E. (2015). Small  
686 molecule disruption of quorum sensing cross-regulation in *Pseudomonas aeruginosa*  
687 causes major and unexpected alterations to virulence phenotypes. *J. Am. Chem. Soc.*  
688 137, 1510-1519. doi: 10.1021/ja5110798

689 Whitchurch, C. B., Alm, R. A., and Mattick, J. S. (1996). The alginate regulator AlgR and  
690 an associated sensor FimS are required for twitching motility in *Pseudomonas*  
691 *aeruginosa*. *Proc. Natl. Acad. Sci. U.S.A.* 93, 9839-9843. doi:  
692 10.1073/pnas.93.18.9839

693 Yeung, A. T., Parayno, A., and Hancock, R. E. (2012). Mucin promotes rapid surface  
694 motility in *Pseudomonas aeruginosa*. *mBio* 3: e00073-12. doi:  
695 10.1128/mBio.00073-12

696

697 **Figure captions**

698 **Fig. 1. FleS and FleR regulate biofilm formation and motility in PAO1. (A)**

699 Time-course analysis of biofilm formation in PAO1 and its *fleS* or *fleR* mutants as well as  
700 their complemented strains. The data is the mean of six replicates with standard  
701 deviations. **(B)** Swarming and **(C)** swimming motility of PAO1 and its *fleS* or *fleR*  
702 mutants as well as their complemented strains. The vector pBBR1-MCS5 in wild-type  
703 PAO1 serves as the empty control for complemented vectors and the *fliC* mutant serve as  
704 the negative control for the motility assay.

705 **Fig. 2. Analysis of the *fleSR* operon and the domain structures of their products. (A)**

706 Predicted genetic organization of the sensor kinase gene *fleS* and the response regulator  
707 gene *fleR* with their transcriptional orientation are indicated by open arrow. The relative  
708 locations of primers F1, R1, R2 and R3 used for RT-PCR analysis are indicated by solid  
709 arrows. The panels below are the domain structures of FleS and FleR, respectively,  
710 predicted by the SMART program. PAS: PAS domain; HK: histidine kinase A domain;  
711 HA: histidine kinase-like ATPase domain; REC: CheY homologous receiver domain;  
712 AAA: AAA domain; HTH: helix-turn-helix domain. **(B)** RT-PCR analysis based on the  
713 cDNA sample showed that *fleS* and *fleR* are co-transcribed. The RNA sample used for  
714 cDNA synthesis is used for PCR-1 analysis to preclude the possibility of genomic DNA  
715 contamination in the purified total RNA samples. Genomic DNA of PAO1 is used as the  
716 template for PCR-2 as a positive control.

717 **Fig. 3. FleS and FleR constituted a two-component system. (A)** Quantitative

718 determination of biofilm formation of PAO1 and its derivatives after 10-h inoculation.  
719 The data is the mean of six replicates with standard deviations. \*:  $p < 0.05$ , ns: not



720 significant, tested by Student's *t*-test. **(B)** Swimming motility of PAO1 and its  
721 derivatives.

722 **Fig. 4. KEGG-enrichment of differentially expressed genes identified in RNA-seq**  
723 **analysis.** The Y axis represents the names of the pathways. The X axis represents the rich  
724 factor. The size of the dot represents the number of differentially expressed genes in the  
725 pathways, and the color of the dot represents different Q values. The higher the value of  
726 rich factor represents the greater the enrichment degree. The smaller the Q value  
727 represents the more significant the enrichment. Rich factor index is used to measure the  
728 enrichment degree of pathway. Rich factor refers to the ratio of the number of genes  
729 annotated to the pathway in differentially expressed genes to the total number of genes in  
730 the pathway in all annotated genes.

731 **Fig. 5. Effects of *fleS* and *fleR* on the elastase and pyocyanin productions.** **(A)**  
732 Elastase and **(B)** pyocyanin productions in PAO1 and its *fleS* and *fleR* mutants as well as  
733 their corresponding complemented strains. The data is the mean of triplicates with  
734 standard deviations. \*:  $p < 0.05$ , ns: not significant, tested by Student's *t*-test.

735 **Fig. 6. FleS and FleR regulate cell aggregation and *siaA/B/C/D* genes.** **(A)** qRT-PCR  
736 analysis of the expression of *siaA/B/C/D* genes in the PAO1 strain and its *fleS* and *fleR*  
737 derivatives. The *rplU* gene encoding 50S ribosomal protein serves as an internal control.  
738 The data is the mean of three replicates with standard deviations. \*:  $p < 0.05$ , ns: not  
739 significant, tested by Student's *t*-test. **(B)** Cell aggregation phenotypes of PAO1 and its  
740 derivatives grew in liquid M9 medium containing 0.1% SDS.

741 **Fig. 7. FleR auto-regulates the transcription of *fleSR*.** **(A)** qRT-PCR analysis of the

742 expression levels of *fleS* and *fleR* in the *fleS* and *fleR* deletion mutants. The data is the  
743 mean of triplicate with standard deviations. \*:  $p < 0.05$ , ns: not significant, tested by  
744 Student's *t*-test. (B) Predicted *fleSR* promoter region (*PfleSR*). The putative -10 and -35  
745 elements, the Shine-Dalgarno (SD) sequence, and the *fleS* translation start codon ATG are  
746 indicated. (C) EMSA examination for the interaction of FleR with *PfleSR*. A  
747 biotin-labeled DNA fragment of *PfleSR* is examined with increasing amounts of FleR. For  
748 competition analysis, unlabeled *PfleSR* probe is added to the reactions as indicated in the  
749 figure.

750 **Fig. 8. EMSA examinations of FleR binding to the promoter regions of selected**  
751 **flagellum biosynthesis genes.** (A) EMSA examinations of FleR binding to the promoters  
752 of *flgBCDE* (*PflgBCDE*), *flgFGHIJKL* (*PflgFGHIJKL*), *fliC* (*PfliC*), *fliK* (*PflgK*) and  
753 *flgMN* (*PflgMN*) with increasing concentrations of FleR. FleR does not bind to *PflgMN*  
754 and *PflgK*. (B) Analysis of the specific binding of FleR to *PflgBCDE*, *PflgFGHIJKL* and  
755 *PfliC* using unlabeled competitive probes which are added to the reaction mixture as  
756 indicated. (C) Bovine serum albumin (BSA) serves as a negative control which does not  
757 interact with *PflgBCDE*, *PflgFGHIJKL* and *PfliC*.

758

759

760

761 **Supplementary Table and Figure captions:**

762 **Table S1.** Bacterial strains and plasmids used in this study.

763 **Table S2.** PCR primers used in this study.

764 **Table S3.** Full list of differentially expressed genes ( $\text{Log}_2$ fold change  $\geq 1.2$ ) in the *fleR*  
765 mutant compared to the wild-type strain. Significantly differentially expressed genes are  
766 determined by Cufflinks after Benjamini-Hochberg correction. The fold change is the  
767 ratio of the mutant FPKM to the wild-type FPKM.

768 **Fig. S1.** Growth of PAO1 and its *fleS* and *fleR* mutants as well as corresponding  
769 complemented strains. The data is the mean of five replicates with standard deviations.

770 **Fig. S2.** The relative mRNA levels of the genes involved in pyocyanin biosynthesis  
771 (*phzMS*, *phzA1-G1*) (A), c-di-GMP metabolism (*gcbA*, *sadC*, *mucR*, *PA2657*, *PA4929*)  
772 and secretion systems (*hcp1*, *tssB1*, *exsC*) (B) in PAO1 and  $\Delta$ *fleR*. The data is the mean of  
773 triplicates with standard deviations. \*:  $p < 0.05$ , ns: not significant, tested by Student's  
774 *t*-test.

775 **Fig. S3.** The relative mRNA levels of the genes encoding pyoverdine (A) (*pvdA*, *pvdQ*,  
776 *pvdO*, *pvdF*), pyochelin (*pchABCD*) and flagellum biosynthesis (B) (*flgB-I*, *fliC*, *flgK*,  
777 *flgMN*) in PAO1 and  $\Delta$ *fleR*. The data is the mean of triplicates with standard deviations. \*:  
778  $p < 0.05$ , ns: not significant, tested by Student's *t*-test.

779 **Fig. S4.** EMSA examinations of FleR binding to the promoters of pyocyanin biosynthesis  
780 operons *phzA1-G1* (*PphzA1-G1*) and *phzA2-G2* (*PphzA2-G2*), Pel biosynthesis operon  
781 *pelA-G* (*PpelA-G*) and Psl biosynthesis operon *pslA-O* (*PpslA-O*).

782 **Fig. S5.** The promoters of *flgBCDE*, *flgFGHIJKL*, *fliC* and *fleSR* are aligned using clustal  
783 X. Blue color represents 100 % identity and pink color represents 75 % identity.

784

785 **Table 1.** Selected gene families with more than 1.2-Log<sub>2</sub>fold changes owing to the  
 786 deletion of *fleR* in PAO1 ( $\Delta$ *fleR*/PAO1 WT)\*.

| Gene family                                         | Gene name or ID                                                                           | Fold change          |
|-----------------------------------------------------|-------------------------------------------------------------------------------------------|----------------------|
| <u>Flagellum synthesis, motility and chemotaxis</u> |                                                                                           |                      |
| <i>Flagellum and pilus proteins</i>                 | <i>flgB, flgC, flgD, flgE, flgF, fliC, fliK, fliL, flgZ, PA3740, PA4324</i>               | -1.76 to -4.92       |
| <i>Chemotaxis</i>                                   | <i>PA1608, PA2652, PA2788, PA2867, PA4290, pctA, pctB, PA4520, PA4633, PA4844, PA5072</i> | -1.35 to -3.31       |
| <u>Iron uptake</u>                                  |                                                                                           |                      |
| <i>TonB protein</i>                                 | <i>chtA</i>                                                                               | -1.50                |
| <i>Pyochelin</i>                                    | <i>fptA, pchG, pchF, pchE, pchD, pchA</i>                                                 | -1.2 to -2.53        |
| <i>Pyoverdine</i>                                   | <i>pvdA, pvdO, opmQ</i>                                                                   | -1.58 to -1.77       |
| <i>Other proteins</i>                               | <i>fpvA, tseF, PA2384</i>                                                                 | -1.34 to -3.51       |
| <u>Antibacterial substances</u>                     |                                                                                           |                      |
| <i>Pyocyanin</i>                                    | <i>phzA2, phzD2, phzE2, phzF2, phzB1, phzD1, phzE1, phzF1</i>                             | -1.32 to -1.70       |
| <u>Virulence factors</u>                            |                                                                                           |                      |
| <i>Type III secretion system (T3SS)</i>             | <i>pscN, popN, pcr1, pcr4, pcrD, pcrG, exsC, pscB, pscE</i>                               | 1.20 to 3.06         |
| <i>Type VI secretion system (T6SS)</i>              |                                                                                           |                      |
| <i>H1-T6SS</i>                                      | <i>tssB1, tssC1, hcp1, tssE1, tssG1, clpV1, vgrG1, tse1, tse3</i>                         | 1.22 to 2.02         |
| <i>H2-T6SS</i>                                      | <i>hsiB2, hsiC2, hsiF2, hsiG2, clpV2, sfa2, fha2, lip2, hsiJ2, dotU2, icmF2, pldA</i>     | -1.24 to -1.85       |
| <u>EPS component</u>                                |                                                                                           |                      |
| <i>Alginate</i>                                     | <i>amrZ</i>                                                                               | -1.37                |
| <u>Multidrug resistance</u>                         |                                                                                           |                      |
| <i>Drug resistance</i>                              | <i>PA1435, PA3523</i>                                                                     | -1.25, -1.44         |
| <u>Two-component system</u>                         |                                                                                           |                      |
| <i>Histidine kinase</i>                             | <i>PA0172, ercS', ercS</i>                                                                | -1.31, -1.24, -1.64, |
| <i>Histidine kinase</i>                             | <i>PA2137</i>                                                                             | 2.86                 |
| <i>Response regulator</i>                           | <i>PA0179, gltR</i>                                                                       | -1.22, -1.97         |
| <i>Response regulator</i>                           | <i>PA0756</i>                                                                             | 1.81                 |

c-di-GMP

|                                               |                                 |                |
|-----------------------------------------------|---------------------------------|----------------|
| <i>Diguanylate cyclase</i>                    | <i>siaD, sadC, gcbA, PA4929</i> | -1.42 to -4.40 |
| <i>Phosphodiesterase</i>                      | <i>PA2567</i>                   | -1.53          |
| <i>Diguanylate cyclase /phosphodiesterase</i> | <i>mucR</i>                     | -1.50          |

Transcription regulators

|                   |                                                                                                                   |                |
|-------------------|-------------------------------------------------------------------------------------------------------------------|----------------|
| <i>Regulators</i> | <i>PA0123, PA1196, PA1467, PA1663, PA1864, PA2056, PA2096, ptxS, PA2879, PA3508, PA3714, nalC, PA4596, PA4989</i> | -1.23 to -3.43 |
| <i>Regulators</i> | <i>PA0217, PA1380, PA1884, PA2334, PA2766, PA3067, glmR</i>                                                       | 1.25 to 2.74   |

TCA cycle

|                                                |                                                              |                    |
|------------------------------------------------|--------------------------------------------------------------|--------------------|
| <i>Glyoxylate and dicarboxylate metabolism</i> | <i>PA0794</i>                                                | -2.06              |
| <i>Pyruvate metabolism</i>                     | <i>acoB, PA5445, PA0794</i>                                  | 1.36, -1.55, -2.06 |
| <i>Dehydrogenase</i>                           | <i>PA0746, PA2217, PA2552, zwf, fdhA, PA4189, mmsB, mmsA</i> | -1.40 to -2.78     |

---

787 \* Detailed information is provided in the Supplementary Table S3.

788

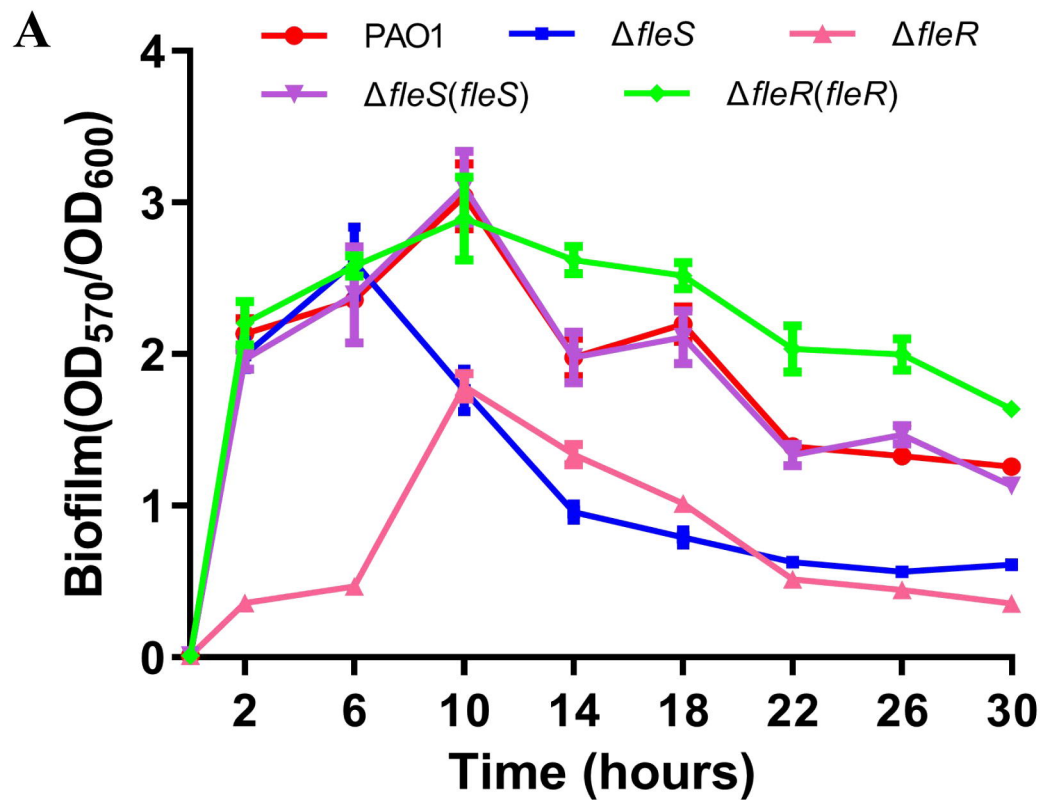

**B** Swarming motility

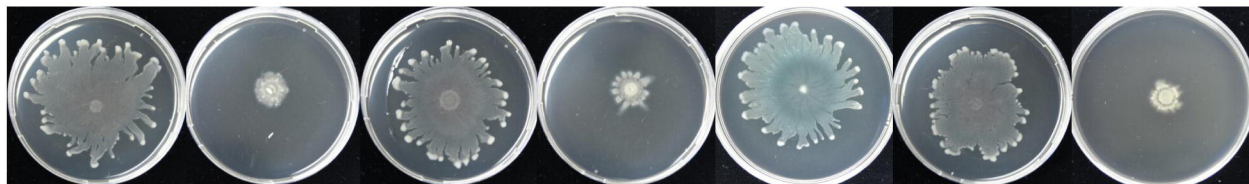

**C** Swimming motility

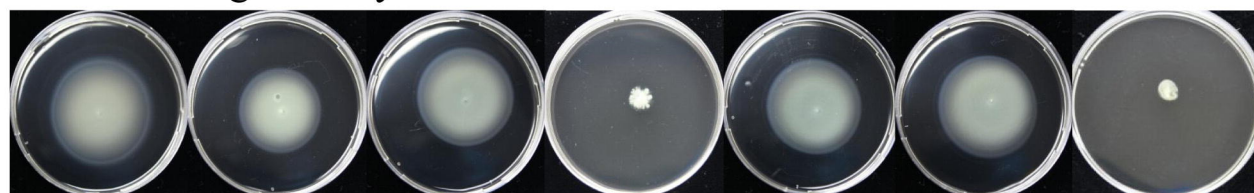

PAO1     $\Delta fleS$      $\Delta fleS(fleS)$      $\Delta fleR$      $\Delta fleR(fleR)$     PAO1(vector)     $\Delta fliC$

**A**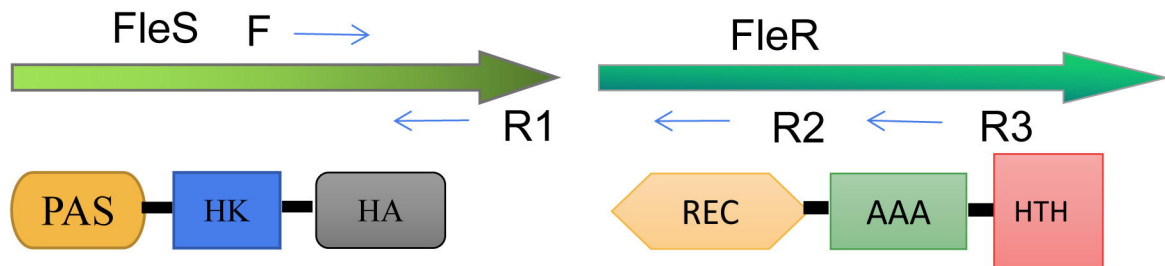**B**

RT-PCR                      PCR-1                      PCR-2

M      FR1   FR2   FR3      FR1   FR2   FR3      FR1   FR2   FR3

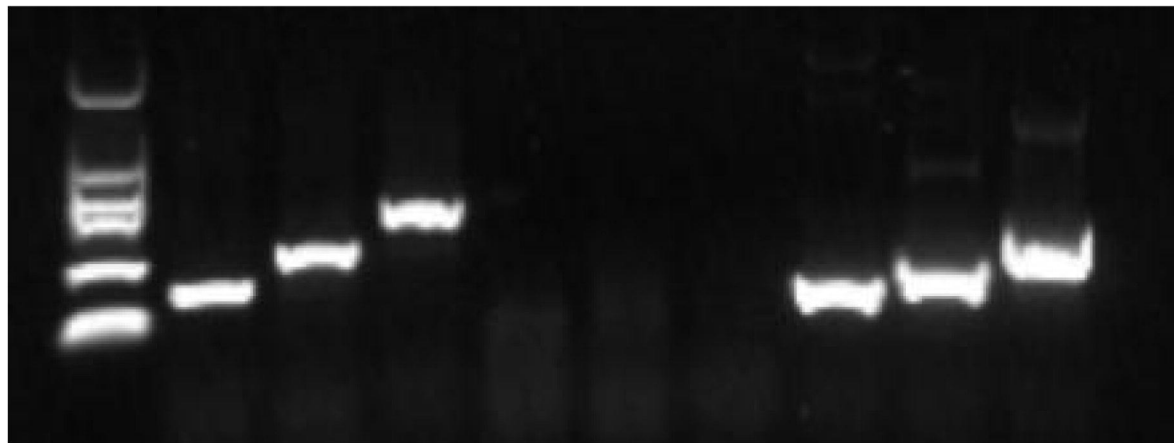

**A**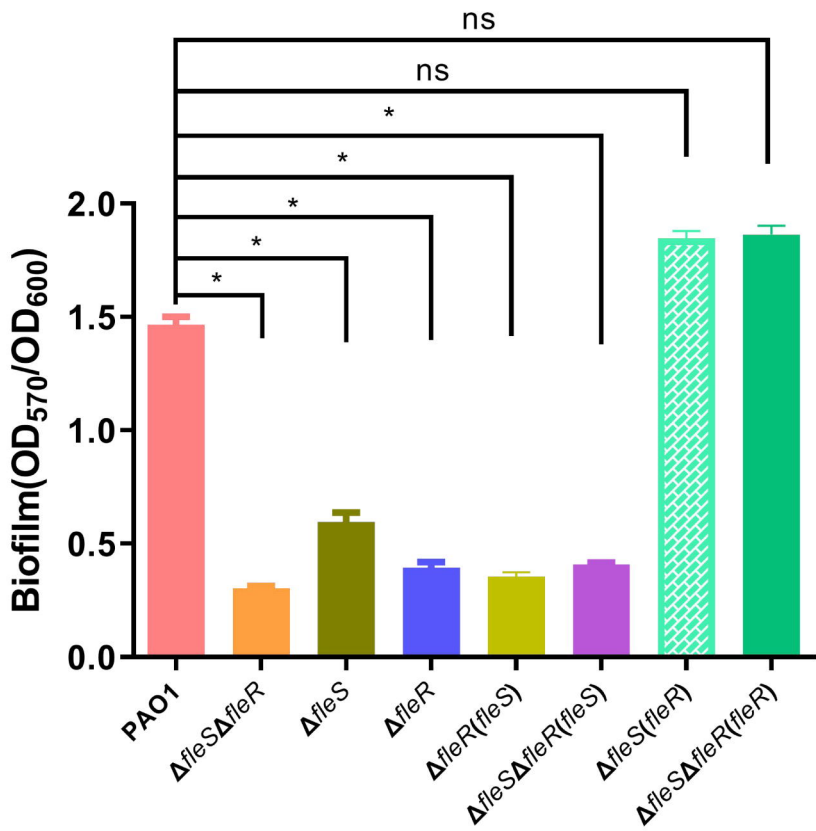**B**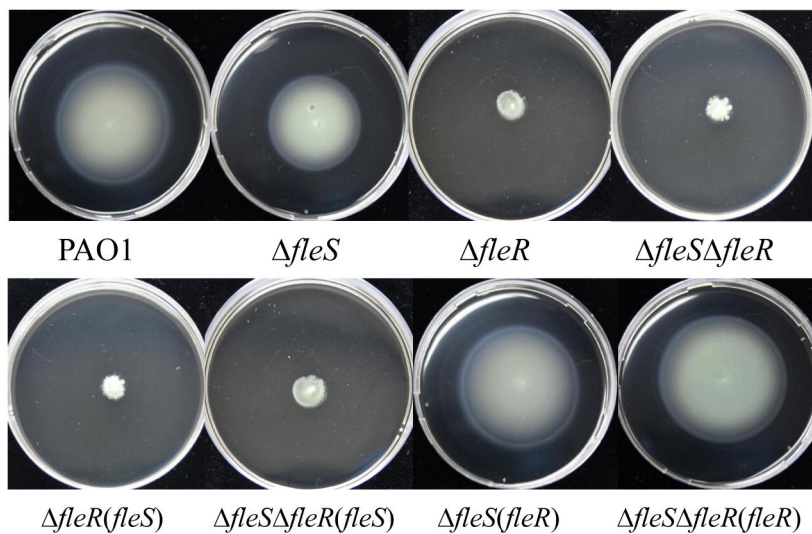



# Top 20 of Pathway Enrichment

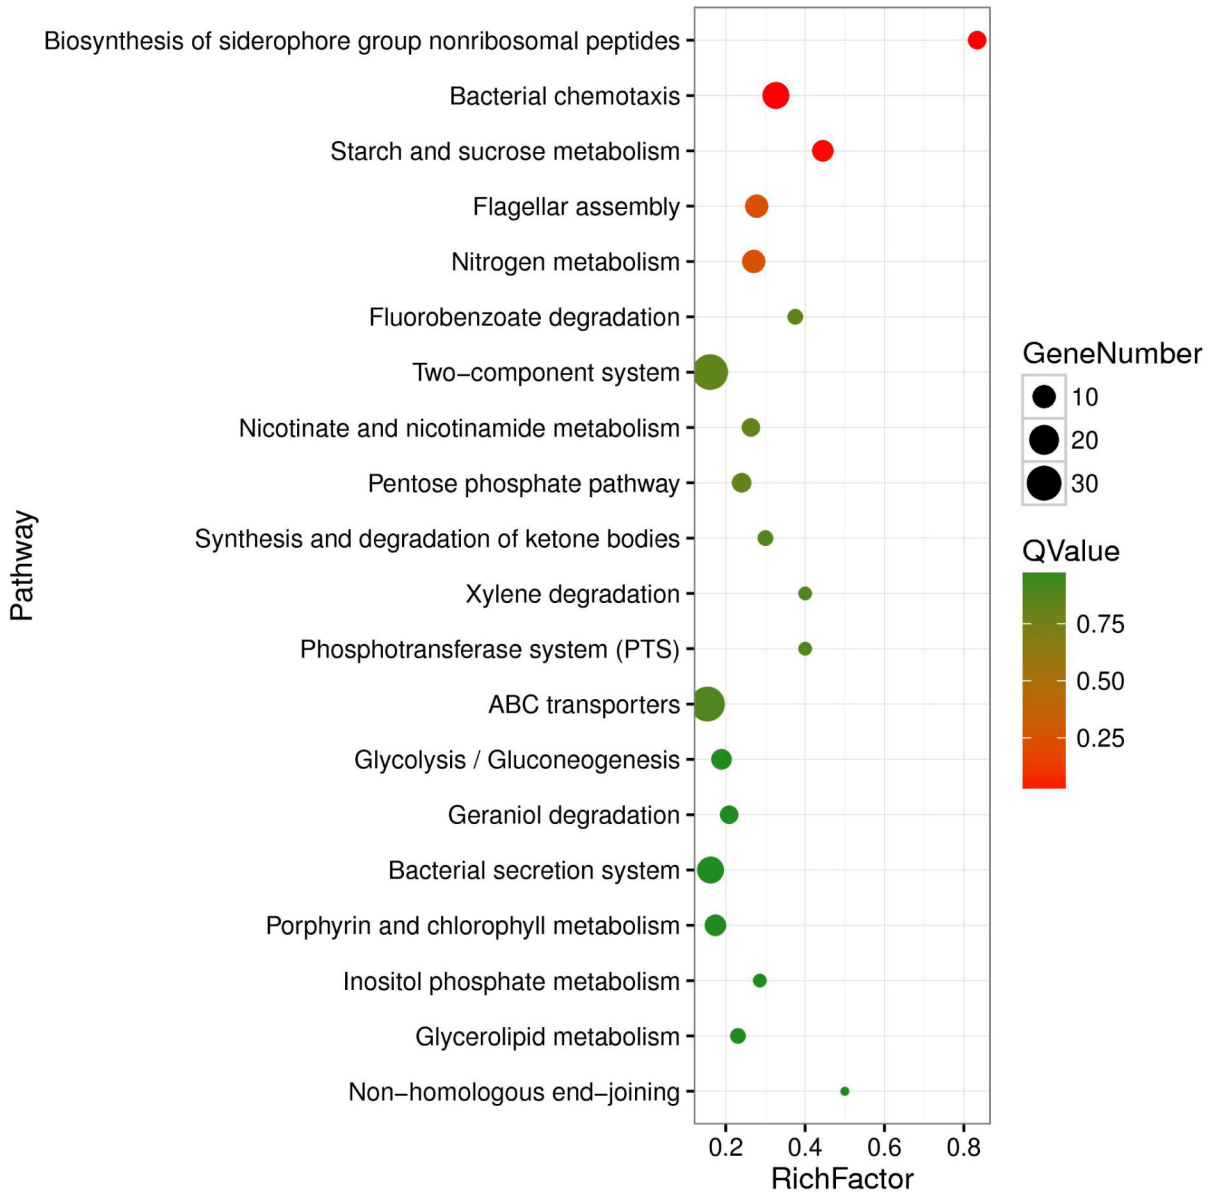

**A**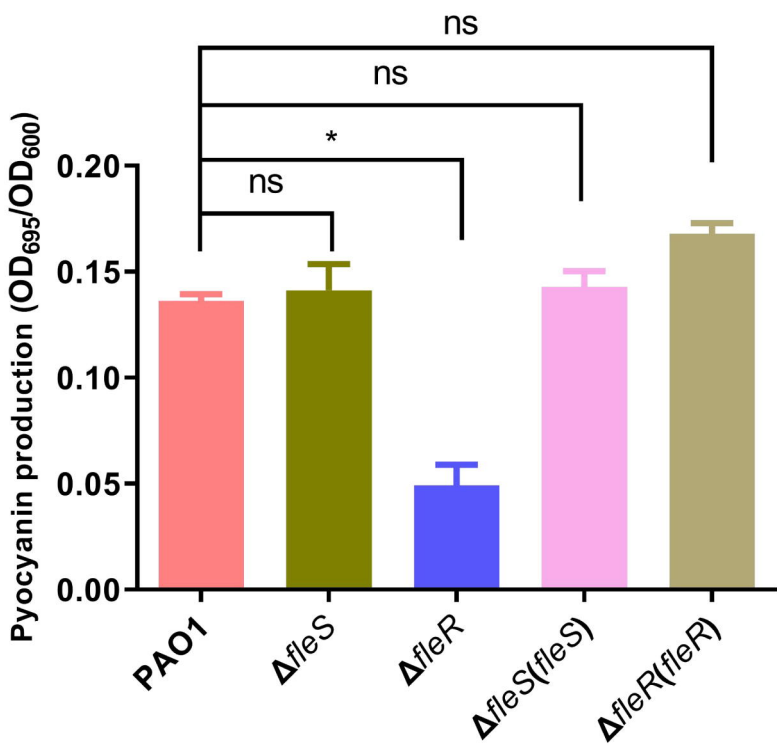**B**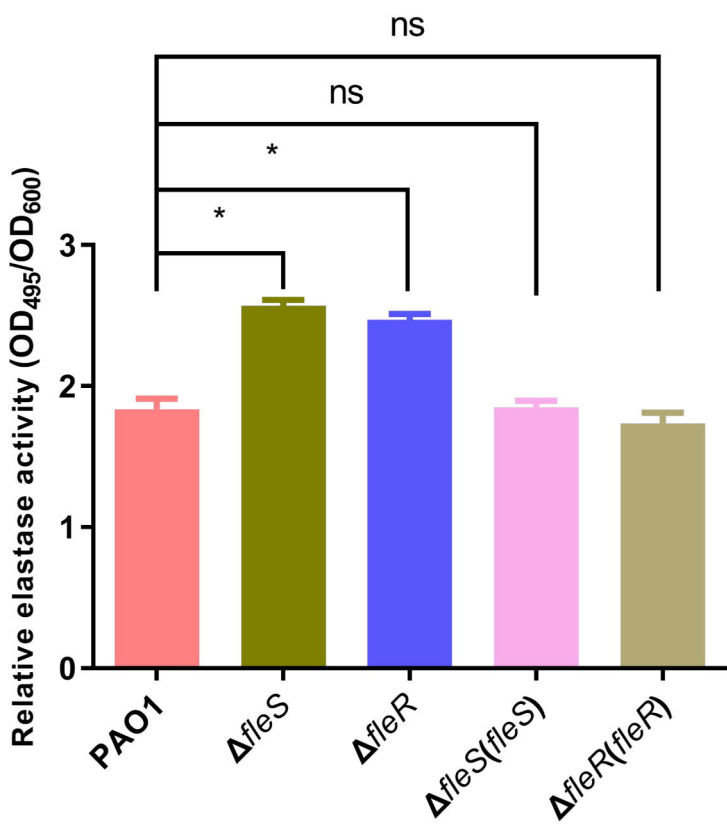

**A**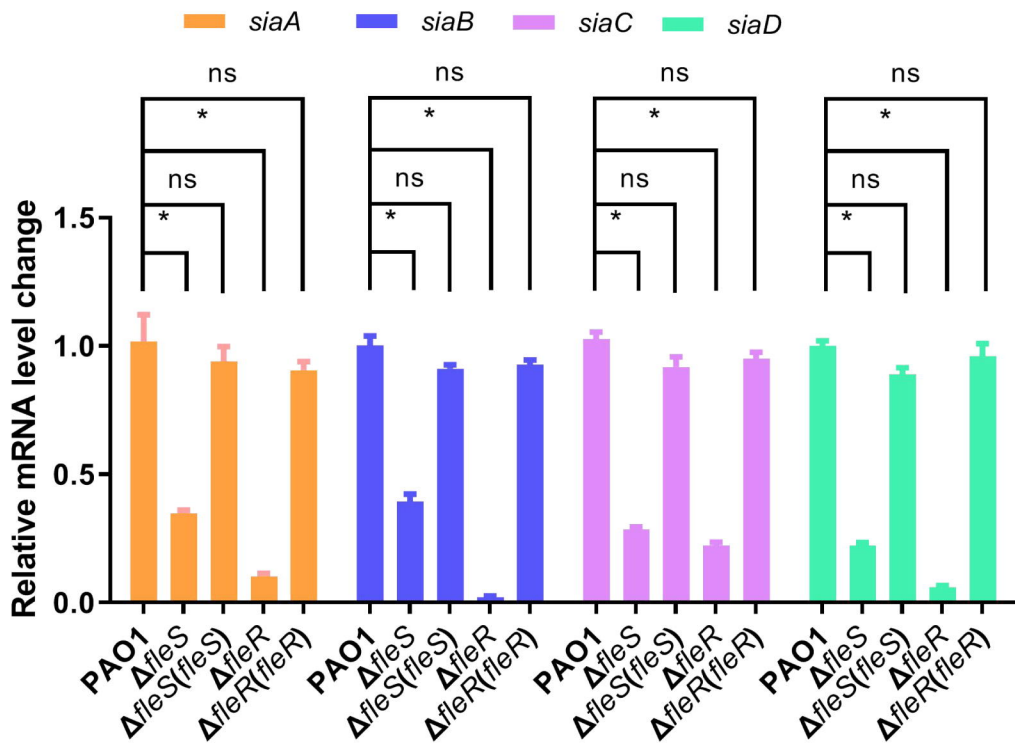**B**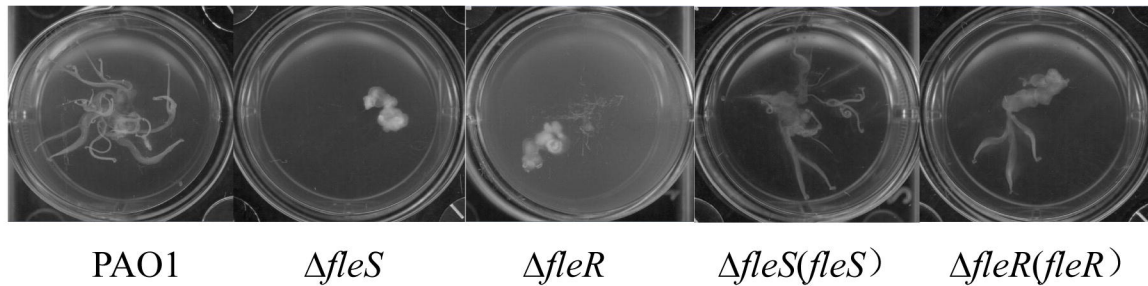

A

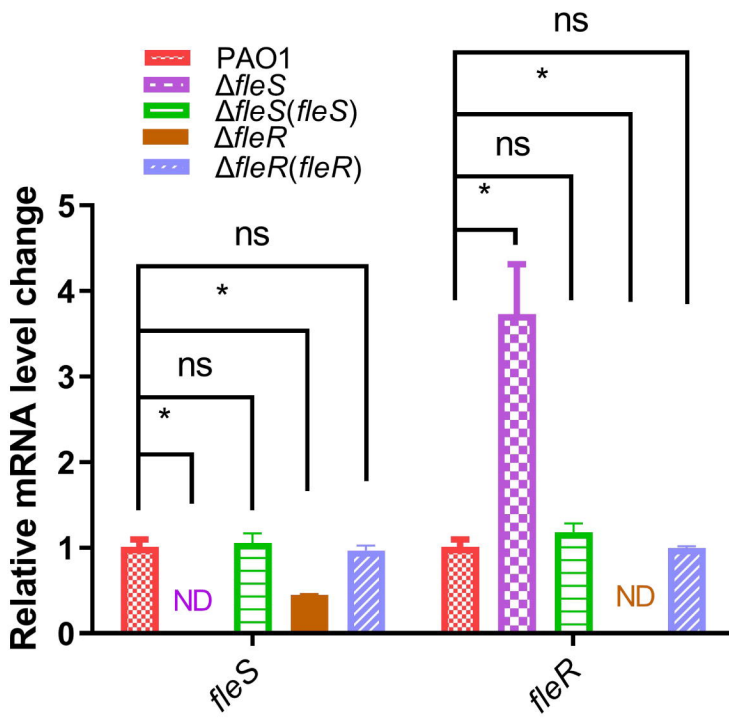

B

CGACGACCTGTCGGATGATTTGACAAGGTCGTTTCGCAACGC  
- 35  
TTTGATTTTCAAATGAAAAAATTTAGGCACGGGTATTGCT  
- 10  
ATATCTCCGTCGACCGACAGAACCATGACGTCGCGCCGAC  
CGAGAGAAACGCAATGCAACCAG  
SD *fleS*

C

| Probe                | <i>PfleSR</i> |   |   |    |     |
|----------------------|---------------|---|---|----|-----|
| FleR ( $\mu$ M)      | 0             | 1 | 5 | 10 | 10  |
| Unlabeled probe (ng) | 0             | 0 | 0 | 0  | 200 |

Bound probe

Free probe

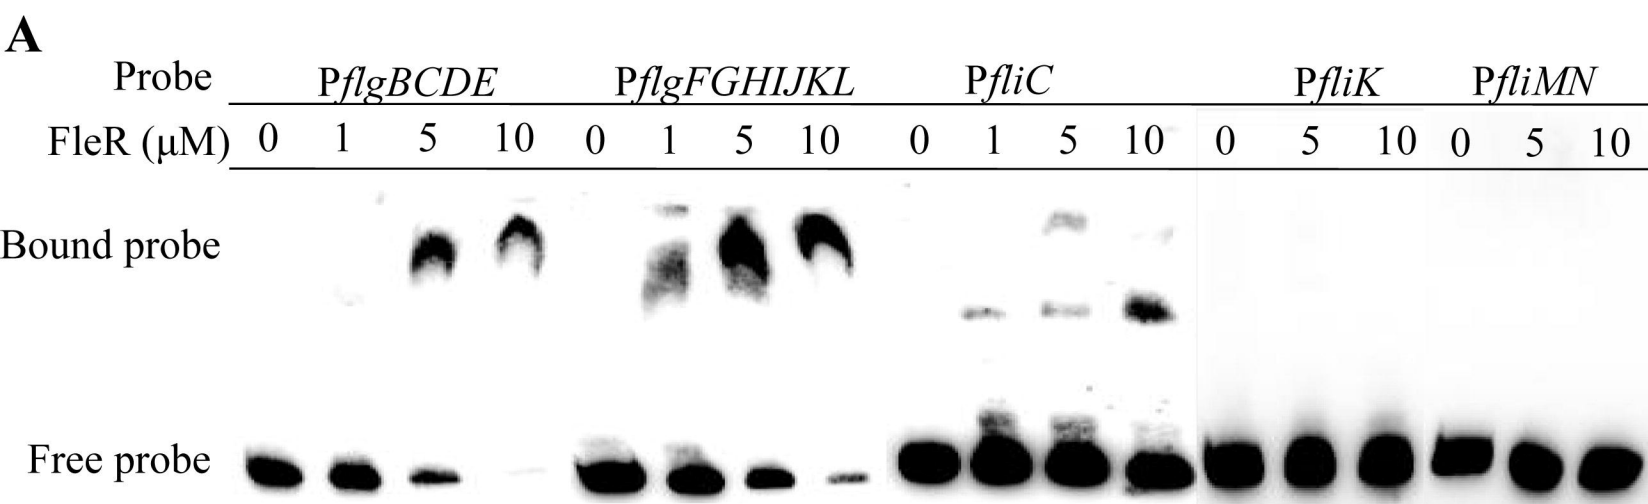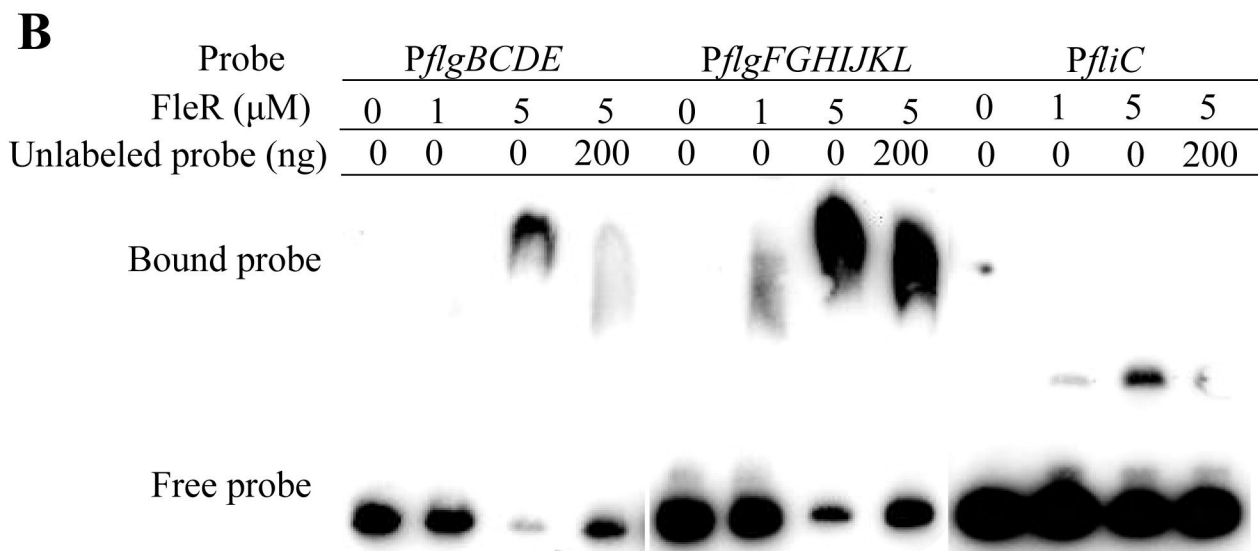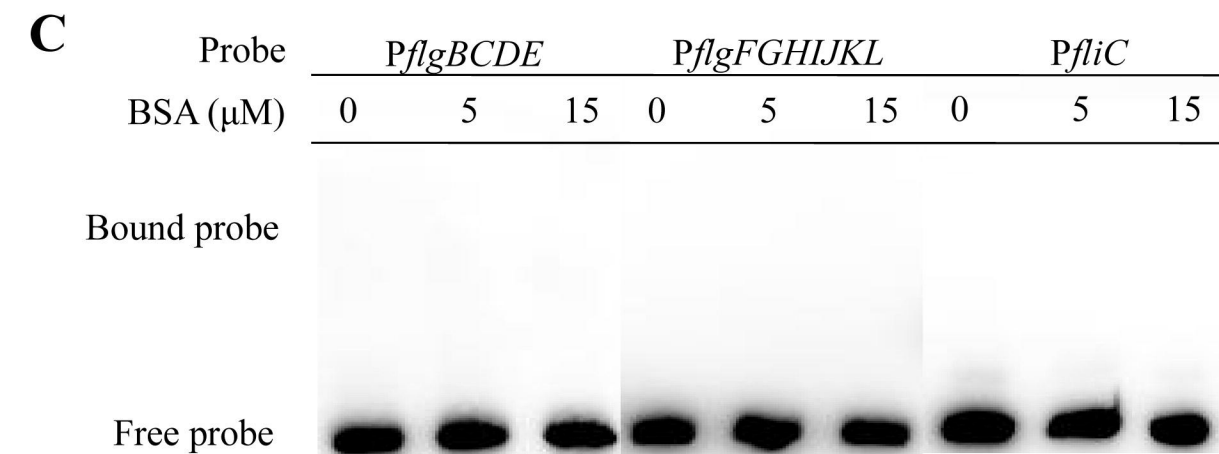

Source: https://biorxiv.org/content/10.1101/2021.04.22.441042v1.full.pdf
